# Supplementary material for: The necessary limits of religious influence on public policy
Source: MDPI journal article supplement (doi:10.3390/molecules27144668), 2010-09-16
Supplement: s1 [file s1]

Supplementary material

to the paper

**Paramagnetic Properties and Moderately Rapid Conformational  
Dynamics in Cobalt(II) Calix[4]arene Complex by NMR**

**Eugeny N. Zapolotsky<sup>a\*</sup>, Sergey P. Babailov<sup>a</sup>, Gennadiy A. Kostin<sup>a</sup>,**

*<sup>a</sup> A.V.Nikolayev's Institute of Inorganic Chemistry SB RAS, Ave. Lavrentyev,  
3, Novosibirsk, 630090, Russia*

\* Author for correspondence [zapolotsky.en@gmail.com](mailto:zapolotsky.en@gmail.com)

**Determination of rate constants**

The rate constants of chemical exchange were found using approximate formulas for the cases of slow (1) and fast two-position chemical exchange (2):

$$k_A = \pi W_A - \frac{1}{T_{2A}}, \quad (1)$$

$$k_A = \frac{\pi}{2} \frac{\delta\nu^2}{(W_A - \frac{1}{T_{2A}})} \quad (2)$$

where  $k_A$  is the chemical exchange rate constant,  $W_A$  is the half-width of the signal peak at half-height,  $T_{2A}$  is the signal transverse relaxation time,  $\delta\nu$  is the difference between the resonant frequencies of the exchanged signals, expressed in Hz. It was assumed that the value of the transverse relaxation time  $T_{2A}$  of the corresponding diamagnetic state does not depend significantly on the temperature.

Calculation of lanthanide induced shifts (LIS) depending on the temperature  $\delta_i(T)$  for various positions in the absence of exchange is carried out according to the formula:

$$\delta_i(T) = \delta_i(T_0) \frac{(1/T + A)}{(1/T_0 + A)}, \quad (3)$$

where  $\delta_i(T_0)$  is the LIS value corresponding to a given position at a low temperature  $T_0 = 273.2\text{K}$ ;  $A$  is a constant determined from the analysis of the temperature dependence of the average value of LIS for all protons involved in the exchange.

The value of parameter  $A$  was determined by the formula (4):

$$A = \frac{\delta_i(T_0)/T - \delta_i(T)/T_0}{\delta_i(T) - \delta_i(T_0)} \quad (4)$$

The values of  $\delta v$  at different temperatures were estimated by taking into account the temperature dependence of LIS for each of the signals of paramagnetic Ln complexes involved in chemical exchange.

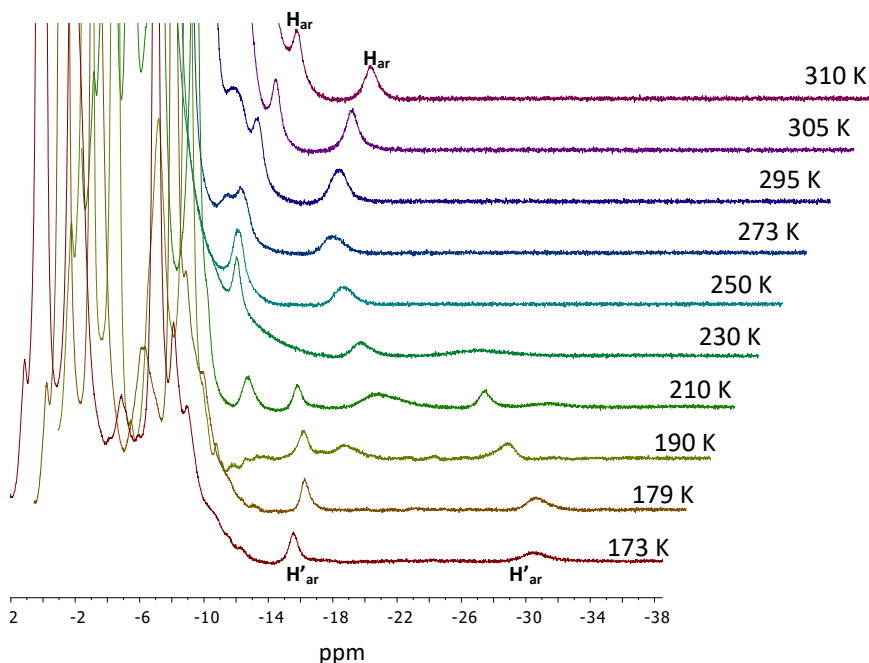

Figure S1.  $^1\text{H}$  NMR spectra of Co calix[4]arene at different temperature.

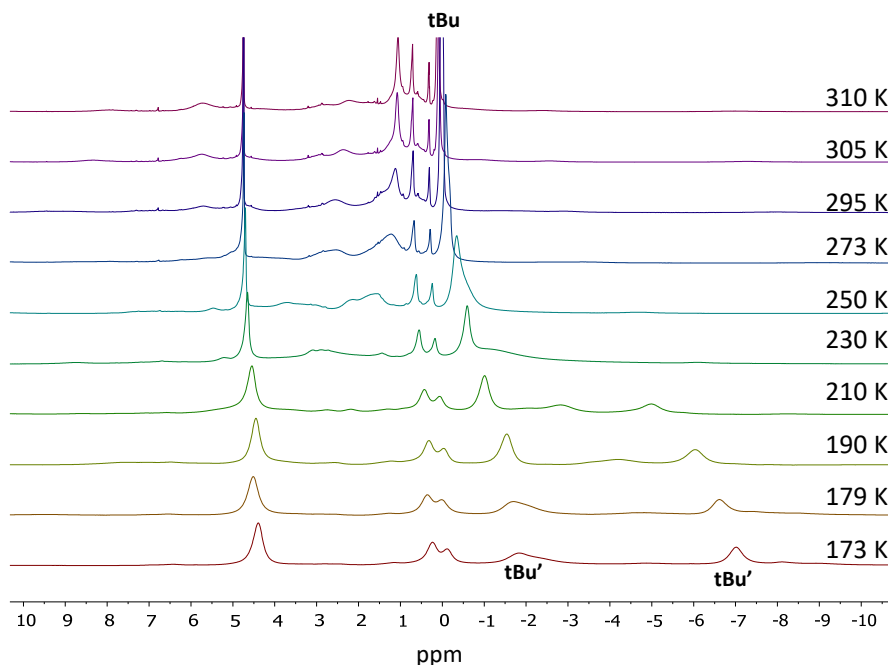

Figure S2.  $^1\text{H}$  NMR spectra of Co calix[4]arene at different temperature.

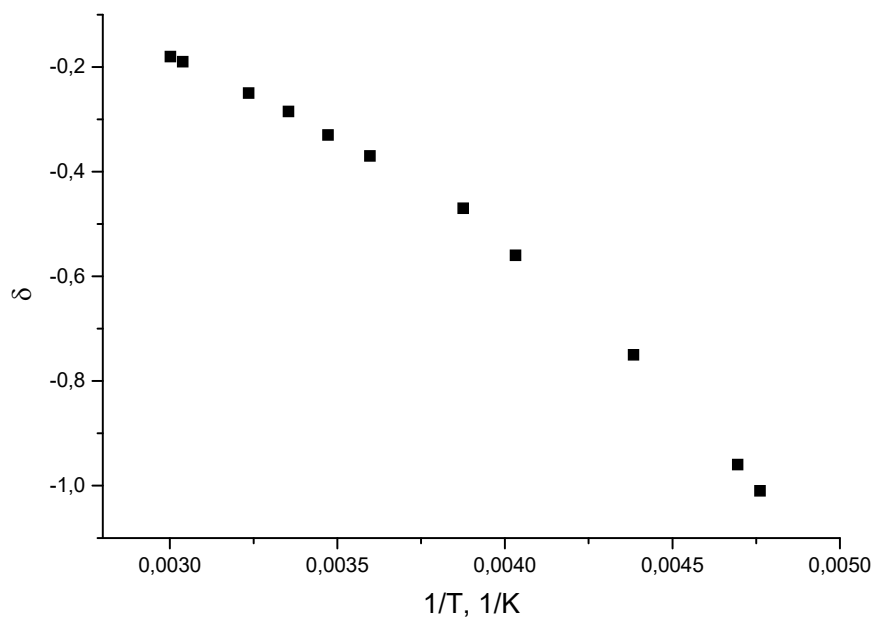

Figure S3. Temperature dependence of the chemical shifts of t-Bu signal of complex (I). The solvent is  $\text{CDCl}_3/\text{CD}_2\text{Cl}_2$ .
